# Supplementary material for: Diel Variations of Extracellular Microcystin Influence the Subcellular Dynamics of RubisCO in Microcystis aeruginosa PCC 7806
Source: MDPI journal article supplement (doi:10.3390/microorganisms9061265), 2021-06-10
Supplement: s1 [file s1]

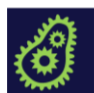

## Supplementary materials

Table S1. Primers used in qRT-PCR.

| Target Gene            | 5′–3′-Sequence       |
|------------------------|----------------------|
| <i>IPF47</i> (forward) | AAACTGCCGGTCAAAATCCC |
| <i>IPF47</i> (reverse) | GCCGCTCAAAATTGCTTTCC |
| <i>mcyA</i> (forward)  | TGGGTTGATAGGGTGCCAAT |
| <i>mcyA</i> (reverse)  | CCTCAATCTCAGCAAGGGGA |
| <i>rbcL</i> (forward)  | AATCAAAACCCCCATCATCA |
| <i>rbcL</i> (reverse)  | TGATCACCACCAGAGAGACG |
| <i>rbcS</i> (forward)  | CTCACCGATCAACAAATTGC |
| <i>rbcS</i> (reverse)  | TTCTTGGGGACCAGAAACAG |
| <i>rnpB</i> (forward)  | GGGGTAAGGGTGCAAAGGT  |
| <i>rnpB</i> (reverse)  | AGACCAACCTTTGTCCCTCC |

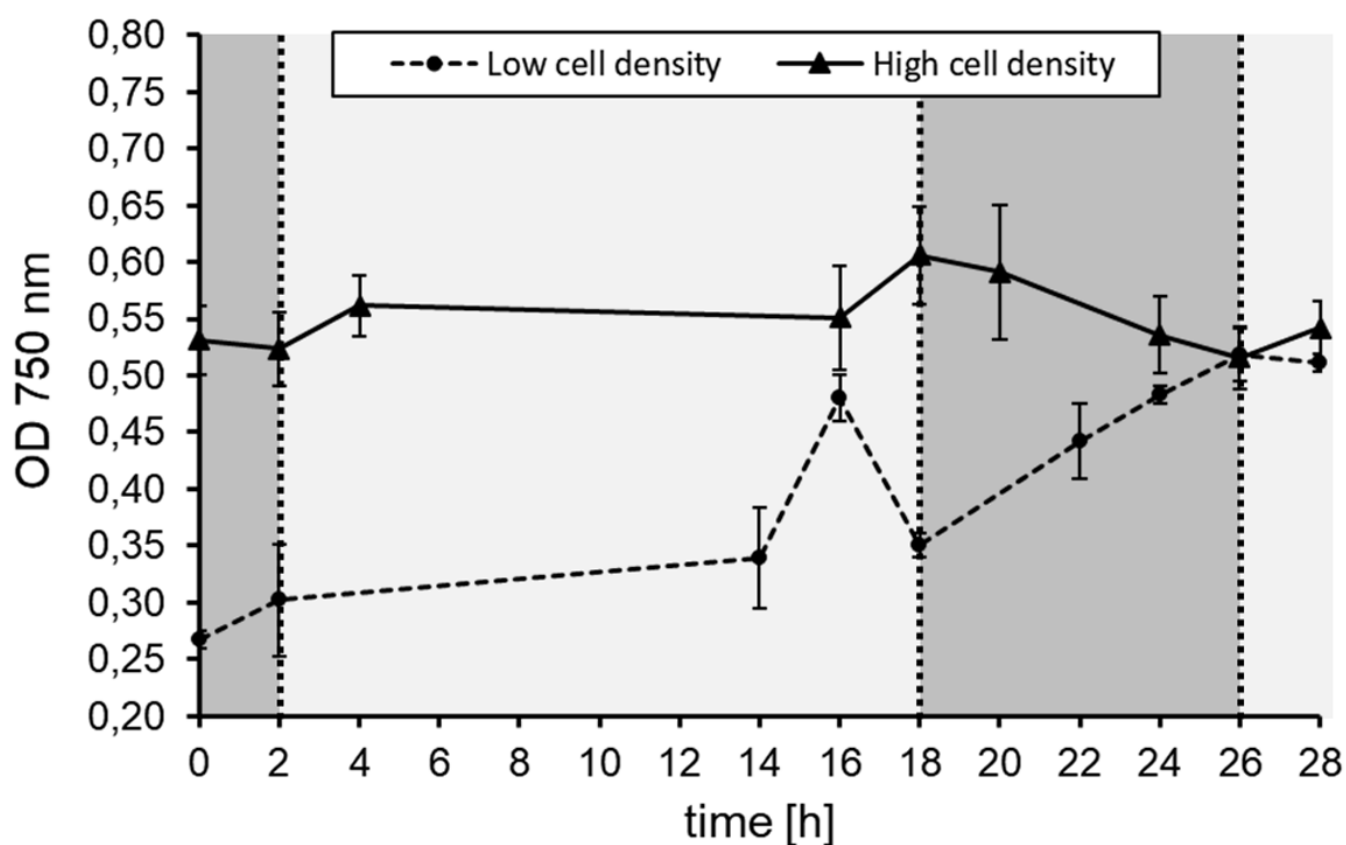

**Figure S1.** Growth curves of liquid cultures of *Microcystis* during a diel growth experiment. Three biological replicates of liquid cultures at two different initial cell densities were sampled at 9 time points and the optical densities were recorded photometrically at 750 nm. Light absorption properties of *Microcystis* cells can vary considerably with fluctuations in gas vesicle content, leading to frequent outlier data points. Lighter and darker shading corresponds to day and night phases, respectively.

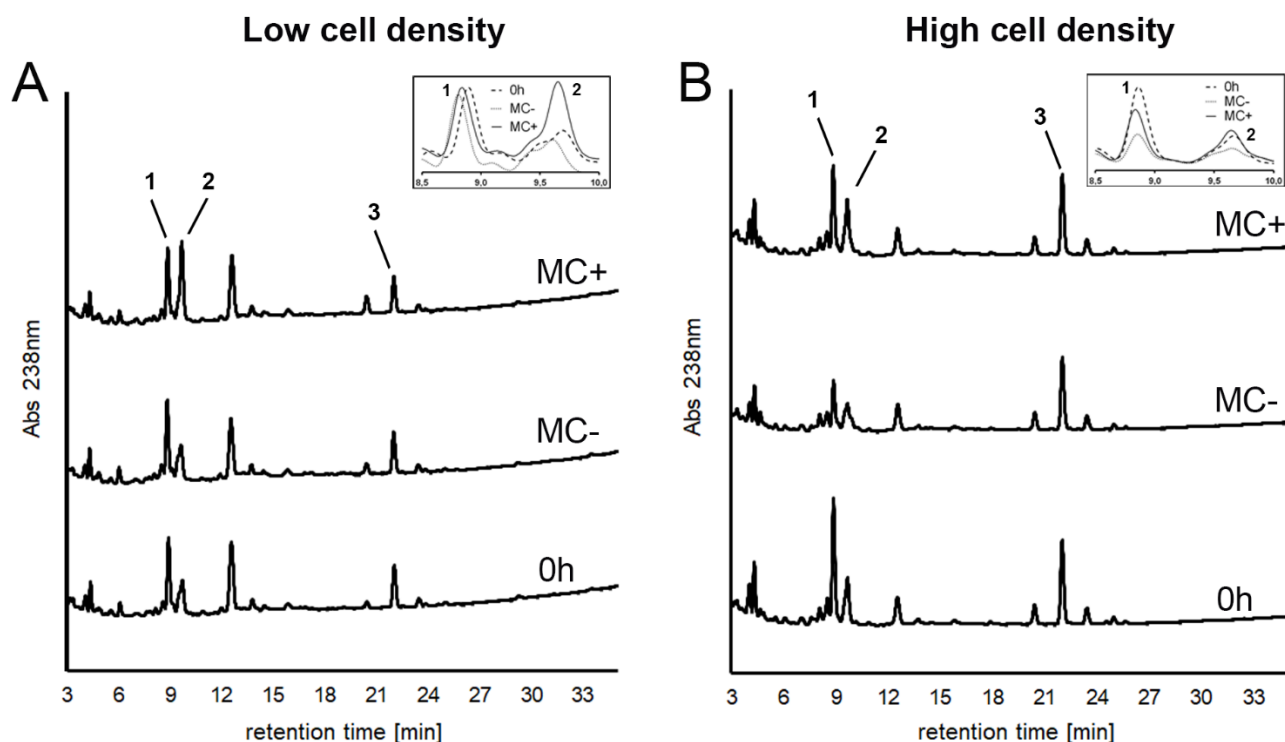

**Figure S2.** HPLC profiles of culture supernatants of liquid cultures of *Microcystis* from a microcystin-addition experiment. Liquid cultures at low (A) and high (B) cell densities were grown for 2 hours at high light with the addition of MC to the growth medium (MC+) or without it (MC-). Culture supernatants were analyzed by HPLC. Insets show magnifications of the two main MC variant peaks from the same chromatograms.

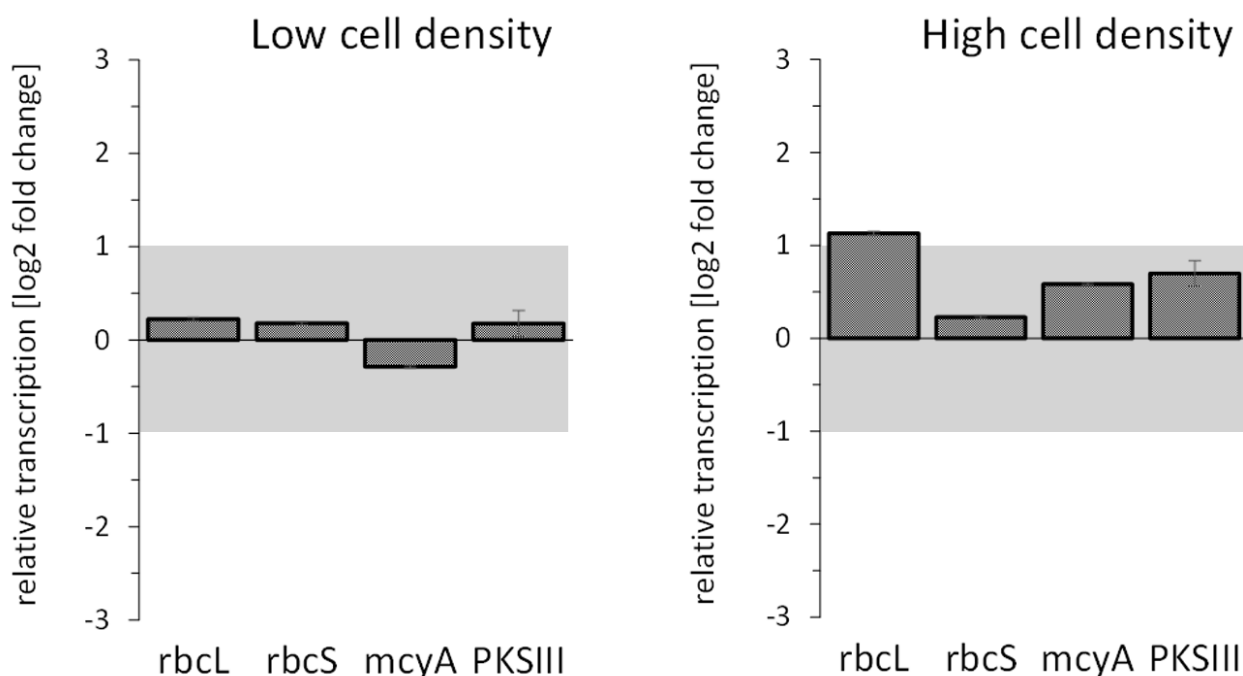

**Figure S3.** Effects on transcription of microcystin addition to *Microcystis* liquid cultures. Low-light adapted liquid cultures at low and high cell densities were exposed for 2 hours to high light with or without the addition of MC to the growth medium. Total RNA was isolated and relative transcription of four genes analyzed by qRT-PCR. Values are normalized to samples without MC addition (log2 fold change = 0). Grey shading indicates interval of log2 fold changes between -1 and 1. Measurements were performed in triplicates.
